# Supplementary material for: Tumor-associated astrocytes inhibit tumor cell apoptosis through TNF- α-TNF receptor 2-NF-κB pathway in lung cancer brain metastasis
Source: Research Square preprint supplement (doi:10.21203/rs.3.rs-7234065/v1), 2025-08-01
Supplement: Supplementary file 1 [file f7d433aad48a113b8ddc9a8f.docx]

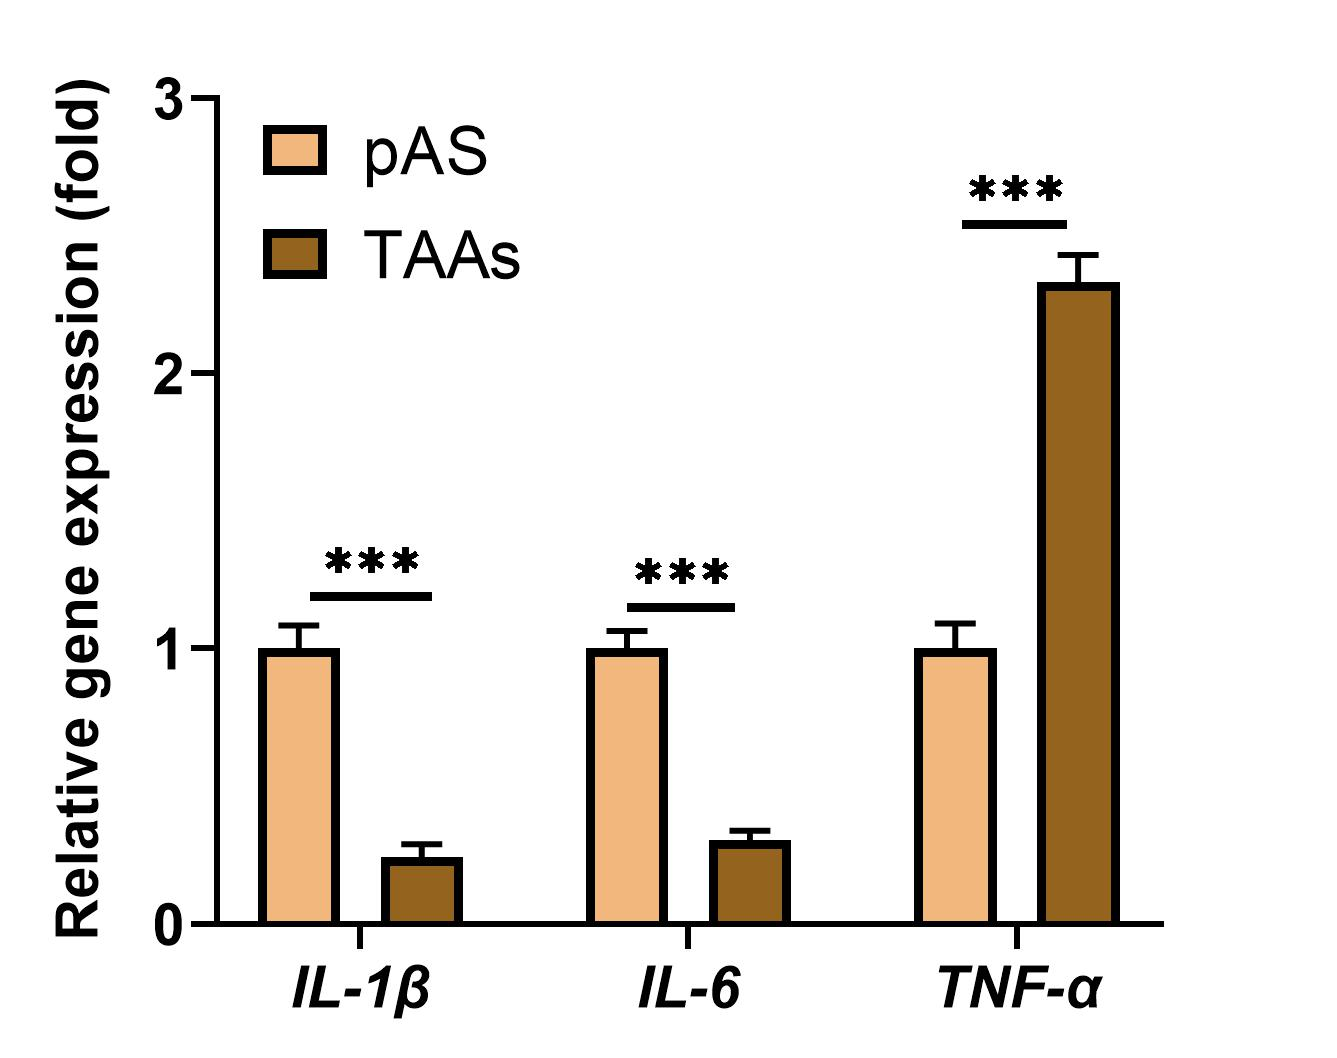


Supplementary Fig.1. The expression of *TNF-ɑ* is upregulated in tumor-associated astrocytes (TAAs). Primary astrocytes (pAS) and TAAs were isolated from normal mouse brain and mouse lung cancer brain metastasis tumors, respectively, and the gene expression levels of *IL-1β*, *IL-6* and *TNF-ɑ* in these cells were determined using qPCR. *** *p* < 0.001.
